# Supplementary material
Source: publisher site journal article supplement (https://www.dovepress.com/article/222555)
Supplement: Supplementary file 1 [file get_supplementary_file.php]

# Supplementary File1: Primer sequence information

**1.1 Homo sapiens FK506 binding protein 14 (FKBP14), transcript variant 1, mRNA**

NM_017946.3

Primer F 5' CGCAAGACCAAAGGAGGG 3'

Primer R 5' TTTTCCATAGCCCAGAGCAG 3'

Pos: 118-339

Amplified product: Size: 222bps

**1.2 Homo sapiens glyceraldehyde-3-phosphate dehydrogenase (GAPDH), transcript variant 1, mRNA**

NCBI Reference Sequence: NM_001256799.2

Primer F 5' AATCCCATCACCATCTTC 3'

Primer R 5' AGGCTGTTGTCATACTTC 3'

Pos: 436-653

Amplified product: Size: 218 bps

**Supplementary Table1: Human gene FKBP14 (NM_017946.3) RNAi targeting locus information**

| RNAi Targeting Locus | | Sequence |
| --- | --- | --- |
| Name | locus positon |
| RNAi1-1 | 191-209 | CCAGATGCGTGAAATGGAA |
| RNAi1-2 | 219-237 | CCGTTGAAGCTGCTAACTA |
| RNAi1-3 | 297-315 | GTCACCTTCGTGAATACCAA |

**Supplementary Table 2: The primary antibodies information**

| Antibody name | Source | Dilution factor |
| --- | --- | --- |
| FKBP14 | Abcam, UK | 1:50 |
| MMP2 | Abcam, UK | 1:1000 |
| STAT3 | CST, USA | 1:100 |
| p-STAT3 | CST, USA | 1:20000 |
| GAPDH | CST, USA | 1:2000 |
